# Supplementary material for: Networking of macrocycles: 1D and 2D coordination polymers of dithia-18-crown-6 with copper(ii) and copper(i)
Source: Royal Society of Chemistry journal article supplement (doi:10.1039/c1ce05587a), 2011-01-01
Supplement: c1ce05587a.pdf [file c1ce05587a.pdf]

## **Electronic Supplementary Information**

**For**

### **Networking of macrocycles: 1D and 2D coordination polymers of dithia-18-crown-6 with copper(I) and copper(II)**

In-Hyeok Park and Shim Sung Lee\*

*Department of Chemistry and Research Institute of Natural Science, Gyeongsang National*

*University, Jinju 660-701, S. Korea. Fax: +82-55-753-7614; Tel: +82-55-772-1483*

*E-mail: sslee@gnu.ac.kr*

**Table S1** Selected bond lengths (Å) and bond angles (°) for **1**

|              |           |              |            |
|--------------|-----------|--------------|------------|
| Cu1-O3       | 1.998(2)  | Cu1-O7       | 2.006(2)   |
| Cu1-O8#1     | 2.363(2)  | Cu1-O1W      | 1.912(2)   |
| Cu1-O2W      | 1.918(2)  |              |            |
| O3-Cu1-O7    | 158.20(9) | O3-Cu1-O1W   | 91.37(10)  |
| O3-Cu1-O8#1  | 81.10(8)  | O3-Cu1-O2W   | 93.41(10)  |
| O7-Cu1-O8#1  | 120.69(8) | O7-Cu1-O1W   | 89.21(10)  |
| O7-Cu1-O2W   | 87.95(11) | O8#1-Cu1-O1W | 89.75(10)  |
| O8#1-Cu1-O2W | 86.77(11) | O1W-Cu1-O2W  | 173.58(11) |

Symmetry transformations used to generate equivalent atoms:

#1 x-1,y,z #2 x+1,y,z #3 -x+2,-y+2,-z+1 #4 -x+3,-y+3,-z

**Table S2** Selected bond lengths (Å) and bond angles (°) for **2**

|             |            |             |            |
|-------------|------------|-------------|------------|
| Cu1-Cu2     | 2.6419(18) | Cu1-Cu3     | 2.7268(19) |
| Cu1-Cu4     | 2.762(2)   | Cu2-Cu3     | 2.6668(18) |
| Cu2-Cu4     | 2.8489(19) | Cu3-Cu4     | 2.6557(18) |
| Cu1-I1      | 2.6574(14) | Cu1-I2      | 2.7276(14) |
| Cu1-I4      | 2.6804(16) | Cu1-S1      | 2.299(3)   |
| Cu2-I1      | 2.7202(15) | Cu2-I2      | 2.6321(15) |
| Cu2-I3      | 2.6725(17) | Cu2-S3      | 2.305(3)   |
| Cu3-I2      | 2.6815(16) | Cu3-I3      | 2.6604(15) |
| Cu3-I4      | 2.6915(15) | Cu3-S4#1    | 2.290(3)   |
| Cu4-I1      | 2.6621(17) | Cu4-I3      | 2.7361(16) |
| Cu4-I4      | 2.6604(15) | Cu4-S2#2    | 2.302(3)   |
| I1-Cu1-I2   | 116.36(5)  | I1-Cu1-I4   | 110.22(6)  |
| I1-Cu1-S1   | 109.46(9)  | I1-Cu2-I2   | 117.49(5)  |
| I1-Cu2-I3   | 107.78(5)  | I1-Cu4-I3   | 107.62(5)  |
| I1-Cu4-I4   | 110.69(6)  | I1-Cu4-S2#2 | 106.55(9)  |
| I2-Cu1-I4   | 110.03(5)  | I2-Cu1-S1   | 104.02(9)  |
| I2-Cu2-I3   | 112.29(5)  | I2-Cu2-S3   | 111.92(9)  |
| I2-Cu3-I4   | 111.10(5)  | I3-Cu2-S3   | 103.70(9)  |
| I3-Cu3-I4   | 117.37(5)  | I3-Cu3-I2   | 111.11(5)  |
| I3-Cu3-S4#1 | 110.59(9)  | I3-Cu4-I4   | 115.82(5)  |
| I3-Cu4-S2#2 | 104.78(9)  | I4-Cu1-S1   | 106.13(9)  |
| I4-Cu4-S2#2 | 110.85(9)  | I4-Cu3-S4#1 | 105.57(9)  |

Symmetry transformations used to generate equivalent atoms:

#1 x-1,y-1,z-1 #2 x-1,y,z-1 #3 x+1,y,z+1 #4 x+1,y+1,z+1

**Table S3** Selected bond lengths (Å) and bond angles (°) for **3**

|              |             |               |             |
|--------------|-------------|---------------|-------------|
| Cu1-S1       | 2.3324(5)   | Cu1-S2#1      | 2.3459(5)   |
| Cu1-I1       | 2.6942(3)   | Cu1-I1#2      | 2.6120(3)   |
| Co1-O1W      | 2.1009(15)  | Co1-O2W       | 2.0378(13)  |
| Co1-O3W      | 2.0932(16)  |               |             |
| S1-Cu1-S2#1  | 99.462(18)  | S1-Cu1-I1#2   | 113.632(15) |
| S1-Cu1-I1    | 108.296(14) | S2#1-Cu1-I1#2 | 124.028(15) |
| S2#1-Cu1-I1  | 100.484(14) | I1-Cu1-I1#2   | 109.388(10) |
| Cu1-I1-Cu1#2 | 70.611(10)  | O1W-Co1-O3W   | 84.48(6)    |
| O2W-Co1-O3W  | 91.62(6)    | O1W-Co1-O2W   | 89.28(6)    |

Symmetry transformations used to generate equivalent atoms:

#1 -x+1,-y+1,-z+1 #2 -x+1,-y,-z+1 #3 -x+1,-y+1,-z

### X-ray structure analysis

In all cases, all nonhydrogen atoms were refined anisotropically and all hydrogen atoms except coordinated water molecules were placed in idealised positions and refined isotropically in a riding manner along with the their respective parent atoms. In the cases of coordinated water molecules, the initial positions of the hydrogen atoms were obtained from difference electron density maps and refined with riding constraints.
